# Supplementary material for: Changes in social inequalities in disability-free life expectancy in Southern Europe: the case of the Basque Country
Source: Springer Nature journal article supplement (doi:10.1186/s12939-014-0074-6), 2014-09-19
Supplement: MOESM1 [file 9762356]

test
